# Supplementary material
Source: PubMed Central journal article supplement (PMC4354768)
Supplement: NIHMS668587-supplement-Supporting_Information_Tables.pdf [file NIHMS668587-supplement-Supporting_Information_Tables.pdf]

**Supplementary Table 1.** Associations of relative temporal changes in serum PGI, PGII, the PGI/II ratio, anti-*H. pylori* IgG, and gastrin-17 levels with progression of gastric precancerous lesions controlling for age and sex, Zhuanghe Gastric Diseases Screening Program, China.

| Relative change <sup>a</sup>           | Progression (n) | No progression (n) | OR <sup>b</sup> | 95% CI |      | P for trend |
|----------------------------------------|-----------------|--------------------|-----------------|--------|------|-------------|
| <b>Serum PGI</b>                       |                 |                    |                 |        |      |             |
| Decreased ≥ 50%                        | 97              | 402                | 1.00            | N/A    |      |             |
| Decreased 20 - 50%                     | 148             | 637                | 0.96            | 0.72   | 1.29 |             |
| Within 20%                             | 195             | 678                | 1.19            | 0.90   | 1.58 | < 0.01      |
| Increased 20 - 50%                     | 101             | 303                | 1.48            | 1.07   | 2.03 |             |
| Increased ≥ 50%                        | 123             | 323                | 1.62            | 1.19   | 2.22 |             |
| <b>Serum PGII</b>                      |                 |                    |                 |        |      |             |
| Decreased ≥ 50%                        | 114             | 589                | 1.00            | N/A    |      |             |
| Decreased 20 - 50%                     | 135             | 442                | 1.51            | 1.16   | 1.97 |             |
| Within 20%                             | 147             | 503                | 1.50            | 1.14   | 1.96 | < 0.01      |
| Increased 20 - 50%                     | 64              | 242                | 1.35            | 0.97   | 1.88 |             |
| Increased ≥ 50%                        | 200             | 561                | 1.81            | 1.40   | 2.34 |             |
| <b>Serum PGI/II ratio</b>              |                 |                    |                 |        |      |             |
| Increased ≥ 50%                        | 171             | 698                | 1.00            | N/A    |      |             |
| Increased 20 - 50%                     | 76              | 254                | 1.19            | 0.89   | 1.61 |             |
| Within 20%                             | 148             | 503                | 1.19            | 0.94   | 1.51 | 0.05        |
| Decreased 20 - 50%                     | 111             | 454                | 0.98            | 0.76   | 1.28 |             |
| Decreased ≥ 50%                        | 152             | 409                | 1.43            | 1.11   | 1.85 |             |
| <b>Serum gastrin-17</b>                |                 |                    |                 |        |      |             |
| Decreased ≥ 100%                       | 86              | 319                | 1.00            | N/A    |      |             |
| Decreased 20 to 100%                   | 106             | 378                | 0.95            | 0.69   | 1.33 |             |
| Within 20%                             | 150             | 697                | 0.83            | 0.61   | 1.13 | 0.02        |
| Increased 20 - 500%                    | 162             | 501                | 1.15            | 0.85   | 1.55 |             |
| Increased ≥ 500%                       | 112             | 309                | 1.33            | 0.96   | 1.84 |             |
| <b>Serum anti-<i>H. pylori</i> IgG</b> |                 |                    |                 |        |      |             |
| Decreased ≥ 50%                        | 114             | 577                | 1.00            | N/A    |      |             |
| Decreased 20 - 50%                     | 83              | 367                | 1.21            | 0.90   | 1.62 |             |
| Within 20%                             | 140             | 453                | 1.55            | 1.17   | 2.05 | < 0.01      |
| Increased 20 - 50%                     | 63              | 197                | 1.61            | 1.13   | 2.29 |             |
| Increased ≥ 50%                        | 206             | 528                | 1.96            | 1.50   | 2.55 |             |

<sup>a</sup> Defined as: (follow-up – baseline)/baseline x 100%

<sup>b</sup> Estimated using generalized estimating equations (GEE) for correlated binary outcomes

**Abbreviations:** *H. pylori*: *Helicobacter pylori*; PG: pepsinogen

**Supplementary Table 2.** Associations of relative temporal changes in serum PGI, PGII, the PGI/II ratio, anti-*H. pylori* IgG, and gastrin-17 levels with progression of gastric precancerous lesions using a four-category score system for histopathological diagnosis, Zhuanghe Gastric Diseases Screening Program, China.

| Relative change <sup>a</sup>           | Progression (n) | No progression (n) | OR <sup>b</sup> | 95% CI |      | P for trend |
|----------------------------------------|-----------------|--------------------|-----------------|--------|------|-------------|
| <b>Serum PGI</b>                       |                 |                    |                 |        |      |             |
| Decreased ≥ 50%                        | 70              | 429                | 1.00            | N/A    |      |             |
| Decreased 20 - 50%                     | 103             | 682                | 0.98            | 0.70   | 1.38 |             |
| Within 20%                             | 127             | 746                | 1.10            | 0.79   | 1.54 |             |
| Increased 20 - 50%                     | 67              | 337                | 1.30            | 0.90   | 1.89 | < 0.01      |
| Increased ≥ 50%                        | 92              | 354                | 1.71            | 1.20   | 2.43 |             |
| <b>Serum PGII</b>                      |                 |                    |                 |        |      |             |
| Decreased ≥ 50%                        | 83              | 620                | 1.00            | N/A    |      |             |
| Decreased 20 - 50%                     | 92              | 485                | 1.37            | 1.00   | 1.87 |             |
| Within 20%                             | 98              | 552                | 1.33            | 0.97   | 1.83 |             |
| Increased 20 - 50%                     | 38              | 268                | 1.03            | 0.69   | 1.54 | 0.00        |
| Increased ≥ 50%                        | 147             | 614                | 1.73            | 1.28   | 2.35 |             |
| <b>Serum PGI/II ratio</b>              |                 |                    |                 |        |      |             |
| Increased ≥ 50%                        | 120             | 749                | 1.00            | N/A    |      |             |
| Increased 20 - 50%                     | 55              | 275                | 1.28            | 0.92   | 1.79 |             |
| Within 20%                             | 98              | 553                | 1.16            | 0.87   | 1.54 |             |
| Decreased 20 - 50%                     | 70              | 495                | 0.90            | 0.66   | 1.24 | 0.13        |
| Decreased ≥ 50%                        | 114             | 447                | 1.45            | 1.08   | 1.95 |             |
| <b>Serum gastrin-17</b>                |                 |                    |                 |        |      |             |
| Decreased ≥ 100%                       | 55              | 350                | 1.00            | N/A    |      |             |
| Decreased 20 to 100%                   | 73              | 411                | 1.06            | 0.71   | 1.58 |             |
| Within 20%                             | 108             | 739                | 1.03            | 0.71   | 1.49 |             |
| Increased 20 - 500%                    | 107             | 556                | 1.23            | 0.86   | 1.75 | < 0.01      |
| Increased ≥ 500%                       | 84              | 337                | 1.59            | 1.09   | 2.33 |             |
| <b>Serum anti-<i>H. pylori</i> IgG</b> |                 |                    |                 |        |      |             |
| Decreased ≥ 50%                        | 82              | 613                | 1.00            | N/A    |      |             |
| Decreased 20 - 50%                     | 52              | 398                | 1.14            | 0.82   | 1.60 |             |
| Within 20%                             | 101             | 492                | 1.64            | 1.19   | 2.26 |             |
| Increased 20 - 50%                     | 44              | 216                | 1.63            | 1.09   | 2.43 | < 0.01      |
| Increased ≥ 50%                        | 138             | 592                | 1.78            | 1.30   | 2.43 |             |

<sup>a</sup> Defined as: (follow-up – baseline)/baseline x 100%

<sup>b</sup> Estimated using generalized estimating equations (GEE) for correlated binary outcomes

**Abbreviations:** *H. pylori*: *Helicobacter pylori*; PG: pepsinogen

**Supplementary Table 3.** Associations of absolute temporal changes in serum PGI, PGII, the PGI/II ratio, anti-*H. pylori* IgG, and gastrin-17 levels with progression of gastric precancerous lesions, Zhuanghe Gastric Diseases Screening Program, China.

| Absolute change <sup>a</sup>           | Progression (n) | No progression (n) | OR <sup>b</sup> | 95% CI |      | P for trend |
|----------------------------------------|-----------------|--------------------|-----------------|--------|------|-------------|
| <b>Serum PGI</b>                       |                 |                    |                 |        |      |             |
| Decreased ≥ 50 ng/mL                   | 107             | 450                | 1.00            | N/A    |      |             |
| Decreased 20 - 50 ng/mL                | 118             | 517                | 0.97            | 0.71   | 1.31 |             |
| Within 20 ng/mL                        | 255             | 847                | 1.24            | 0.95   | 1.61 |             |
| Increased 20 - 50 ng/mL                | 115             | 307                | 1.69            | 1.24   | 2.29 | < 0.01      |
| Increased ≥ 50 ng/mL                   | 69              | 222                | 1.37            | 0.97   | 1.93 |             |
| <b>Serum PGII</b>                      |                 |                    |                 |        |      |             |
| Decreased ≥ 7.5 ng/mL                  | 117             | 598                | 1.00            | N/A    |      |             |
| Decreased 3 - 7.5 ng/mL                | 117             | 340                | 1.69            | 1.27   | 2.25 |             |
| Within 3 ng/mL                         | 191             | 688                | 1.39            | 1.07   | 1.81 |             |
| Increased 3 - 7.5 ng/mL                | 91              | 323                | 1.49            | 1.11   | 2.02 | < 0.01      |
| Increased ≥ 7.5 ng/mL                  | 144             | 388                | 1.82            | 1.37   | 2.41 |             |
| <b>Serum PGI/II ratio</b>              |                 |                    |                 |        |      |             |
| Increased ≥ 5 units                    | 112             | 475                | 1.00            | N/A    |      |             |
| Increased 2 - 5 units                  | 96              | 334                | 1.22            | 0.91   | 1.63 |             |
| Within 2 units                         | 211             | 756                | 1.18            | 0.92   | 1.52 |             |
| Decreased 2 - 5 units                  | 94              | 364                | 1.08            | 0.80   | 1.45 | 0.03        |
| Decreased ≥ 5 units                    | 145             | 389                | 1.48            | 1.11   | 1.96 |             |
| <b>Serum gastrin-17</b>                |                 |                    |                 |        |      |             |
| Decreased ≥ 2 pmol/L                   | 111             | 358                | 1.00            | N/A    |      |             |
| Decreased 0.4 - 2 pmol/L               | 82              | 329                | 0.87            | 0.62   | 1.21 |             |
| Within 0.4 pmol/L                      | 149             | 734                | 0.71            | 0.53   | 0.95 |             |
| Increased 0.4 - 4 pmol/L               | 136             | 431                | 1.05            | 0.78   | 1.41 | 0.02        |
| Increased ≥ 4 pmol/L                   | 138             | 352                | 1.28            | 0.95   | 1.72 |             |
| <b>Serum anti-<i>H. pylori</i> IgG</b> |                 |                    |                 |        |      |             |
| Decreased ≥ 20 EIU                     | 113             | 548                | 1.00            | N/A    |      |             |
| Decreased 8 - 20 EIU                   | 76              | 340                | 1.04            | 0.77   | 1.42 |             |
| Within 8 EIU                           | 176             | 605                | 1.35            | 1.03   | 1.76 |             |
| Increased 8 - 20 EIU                   | 90              | 254                | 1.64            | 1.20   | 2.25 | < 0.01      |
| Increased ≥ 20 EIU                     | 151             | 375                | 1.85            | 1.38   | 2.47 |             |

<sup>a</sup> Defined as: (follow-up – baseline)

<sup>b</sup> Estimated using generalized estimating equations (GEE) for correlated binary outcomes

**Abbreviations:** *H. pylori*: *Helicobacter pylori*; PG: pepsinogen

**Supplementary Table 4.** Associations of rate of temporal changes in serum PGI, PGII, the PGI/II ratio, anti-*H. pylori* IgG, and gastrin-17 levels with progression of gastric precancerous lesions, Zhuanghe Gastric Diseases Screening Program, China.

| Rate of change <sup>a</sup> (per year)       | Progression (n) | No progression (n) | OR <sup>b</sup> | 95% CI |      | P for trend |
|----------------------------------------------|-----------------|--------------------|-----------------|--------|------|-------------|
| <b>Serum PGI level</b>                       |                 |                    |                 |        |      |             |
| Decreased $\geq$ 20 ng/mL                    | 142             | 687                | 1.00            | N/A    |      |             |
| Decreased by 5 - 20 ng/mL                    | 137             | 490                | 1.12            | 0.86   | 1.45 |             |
| Within 5 ng/mL                               | 137             | 446                | 1.13            | 0.84   | 1.50 |             |
| Increased by 5 - 20 ng/mL                    | 142             | 355                | 1.74            | 1.34   | 2.28 | < 0.01      |
| Increased by $\geq$ 20 ng/mL                 | 106             | 365                | 1.41            | 1.07   | 1.86 |             |
| <b>Serum PGII level</b>                      |                 |                    |                 |        |      |             |
| Decreased by $\geq$ 5 ng/mL                  | 105             | 553                | 1.00            | N/A    |      |             |
| Decreased by 1 - 5 ng/mL                     | 148             | 499                | 1.33            | 1.00   | 1.77 |             |
| Within 1 ng/mL                               | 145             | 463                | 1.38            | 1.02   | 1.86 |             |
| Increased by 1 - 5 ng/mL                     | 136             | 457                | 1.41            | 1.06   | 1.88 | < 0.01      |
| Increased by $\geq$ 5 ng/mL                  | 126             | 365                | 1.70            | 1.27   | 2.28 |             |
| <b>Serum PGI/II ratio</b>                    |                 |                    |                 |        |      |             |
| Increased by $\geq$ 2 units                  | 155             | 634                | 1.00            | N/A    |      |             |
| Increased by 0.5 - 2 units                   | 92              | 357                | 0.94            | 0.72   | 1.24 |             |
| Within 0.5 units                             | 126             | 401                | 1.05            | 0.80   | 1.38 |             |
| Decreased by 0.5 - 2 units                   | 110             | 391                | 1.01            | 0.78   | 1.32 | 0.06        |
| Decreased by $\geq$ 2 units                  | 175             | 535                | 1.27            | 0.99   | 1.62 |             |
| <b>Serum gastrin-17 level</b>                |                 |                    |                 |        |      |             |
| Decreased by $\geq$ 1 pmol/L                 | 111             | 399                | 1.00            | N/A    |      |             |
| Decreased by 0.01 - 1 pmol/L                 | 102             | 367                | 0.90            | 0.66   | 1.21 |             |
| Within 0.01 pmol/L                           | 108             | 570                | 0.69            | 0.51   | 0.94 |             |
| Increased by 0.01 - 1 pmol/L                 | 102             | 307                | 1.01            | 0.74   | 1.38 | < 0.01      |
| Increased by $\geq$ 1 pmol/L                 | 193             | 561                | 1.20            | 0.92   | 1.58 |             |
| <b>Serum anti-<i>H. pylori</i> IgG level</b> |                 |                    |                 |        |      |             |
| Decreased by $\geq$ 10 EIU                   | 122             | 596                | 1.00            | N/A    |      |             |
| Decreased by 2 - 10 EIU                      | 109             | 451                | 1.02            | 0.77   | 1.36 |             |
| Within 2 EIU                                 | 96              | 314                | 1.24            | 0.91   | 1.68 |             |
| Increased by 2 - 10 EIU                      | 121             | 349                | 1.41            | 1.05   | 1.89 | 0.03        |
| Increased by $\geq$ 10 EIU                   | 158             | 412                | 1.78            | 1.35   | 2.34 |             |

<sup>a</sup> Defined as: (follow-up – baseline)/follow-up time interval

<sup>b</sup> Estimated using generalized estimating equations (GEE) for correlated binary outcomes

**Abbreviations:** *H. pylori*: *Helicobacter pylori*; PG: pepsinogen

**Supplementary Table 5.** Associations of relative temporal changes in serum PGI, PGII, the PGI/II ratio, anti-*H. pylori* IgG, and gastrin-17 levels with progression of gastric precancerous lesions when the follow-up visit was compared with the previous visit, Zhuanghe Gastric Diseases Screening Program, China.

| Relative change <sup>a</sup>           | Progression (n) | No progression (n) | OR <sup>b</sup> | 95% CI |      | P for trend |
|----------------------------------------|-----------------|--------------------|-----------------|--------|------|-------------|
| <b>Serum PGI</b>                       |                 |                    |                 |        |      |             |
| Decreased ≥ 50%                        | 92              | 348                | 1.00            | N/A    |      |             |
| Decreased 20 - 50%                     | 149             | 592                | 0.92            | 0.69   | 1.21 |             |
| Within 20%                             | 199             | 650                | 1.16            | 0.89   | 1.51 |             |
| Increased 20 - 50%                     | 105             | 311                | 1.27            | 0.93   | 1.73 | < 0.01      |
| Increased ≥ 50%                        | 163             | 384                | 1.56            | 1.16   | 2.11 |             |
| <b>Serum PGII</b>                      |                 |                    |                 |        |      |             |
| Decreased ≥ 50%                        | 122             | 556                | 1.00            | N/A    |      |             |
| Decreased 20 - 50%                     | 136             | 431                | 1.44            | 1.10   | 1.88 |             |
| Within 20%                             | 156             | 499                | 1.44            | 1.11   | 1.86 |             |
| Increased 20 - 50%                     | 66              | 266                | 1.12            | 0.81   | 1.55 | < 0.01      |
| Increased ≥ 50%                        | 224             | 530                | 1.92            | 1.49   | 2.46 |             |
| <b>Serum PGI/II ratio</b>              |                 |                    |                 |        |      |             |
| Increased ≥ 50%                        | 205             | 737                | 1.00            | N/A    |      |             |
| Increased 20 - 50%                     | 80              | 246                | 1.21            | 0.91   | 1.62 |             |
| Within 20%                             | 141             | 477                | 1.09            | 0.86   | 1.39 |             |
| Decreased 20 - 50%                     | 120             | 410                | 1.08            | 0.84   | 1.39 | 0.01        |
| Decreased ≥ 50%                        | 154             | 381                | 1.50            | 1.17   | 1.92 |             |
| <b>Serum gastrin-17</b>                |                 |                    |                 |        |      |             |
| Decreased ≥ 100%                       | 117             | 411                | 1.00            | N/A    |      |             |
| Decreased 20 to 100%                   | 92              | 302                | 1.09            | 0.81   | 1.47 |             |
| Within 20%                             | 160             | 651                | 0.82            | 0.64   | 1.06 |             |
| Increased 20 - 500%                    | 174             | 461                | 1.31            | 1.01   | 1.70 | 0.08        |
| Increased ≥ 500%                       | 100             | 291                | 1.20            | 0.88   | 1.61 |             |
| <b>Serum anti-<i>H. pylori</i> IgG</b> |                 |                    |                 |        |      |             |
| Decreased ≥ 50%                        | 120             | 503                | 1.00            | N/A    |      |             |
| Decreased 20 - 50%                     | 94              | 324                | 1.20            | 0.90   | 1.61 |             |
| Within 20%                             | 144             | 443                | 1.35            | 1.04   | 1.74 |             |
| Increased 20 - 50%                     | 66              | 207                | 1.26            | 0.91   | 1.76 | < 0.01      |
| Increased ≥ 50%                        | 229             | 557                | 1.67            | 1.30   | 2.14 |             |

<sup>a</sup> Defined as: (follow-up – baseline)/baseline x 100%

<sup>b</sup> Estimated using generalized estimating equations (GEE) for correlated binary outcomes

**Abbreviations:** *H. pylori*: *Helicobacter pylori*; PG: pepsinogen

**Supplementary Table 6.** Associations of relative temporal changes in serum PGI, PGII, the PGI/II ratio, anti-*H. pylori* IgG, and gastrin-17 levels with progression of gastric precancerous lesions when only second visit and baseline visit were included, Zhuanghe Gastric Diseases Screening Program, China.

| Relative change <sup>a</sup>           | Progression (n) | No progression (n) | OR   | 95% CI |      | P value | P for trend |
|----------------------------------------|-----------------|--------------------|------|--------|------|---------|-------------|
| <b>Serum PGI</b>                       |                 |                    |      |        |      |         |             |
| Decreased ≥ 50%                        | 68              | 283                | 1.00 | N/A    |      | N/A     |             |
| Decreased 20 - 50%                     | 95              | 428                | 0.91 | 0.64   | 1.29 | 0.60    |             |
| Within 20%                             | 120             | 453                | 1.09 | 0.78   | 1.52 | 0.63    |             |
| Increased 20 - 50%                     | 76              | 205                | 1.52 | 1.04   | 2.20 | 0.03    | < 0.01      |
| Increased ≥ 50%                        | 84              | 206                | 1.66 | 1.15   | 2.40 | 0.01    |             |
| <b>Serum PGII</b>                      |                 |                    |      |        |      |         |             |
| Decreased ≥ 50%                        | 84              | 439                | 1.00 | N/A    |      | N/A     |             |
| Decreased 20 - 50%                     | 88              | 310                | 1.48 | 1.06   | 2.06 | 0.02    |             |
| Within 20%                             | 93              | 334                | 1.41 | 1.02   | 1.97 | 0.04    |             |
| Increased 20 - 50%                     | 48              | 169                | 1.51 | 1.02   | 2.25 | 0.04    | < 0.01      |
| Increased ≥ 50%                        | 128             | 320                | 2.09 | 1.53   | 2.86 | <.0001  |             |
| <b>Serum PGI/II ratio</b>              |                 |                    |      |        |      |         |             |
| Increased ≥ 50%                        | 131             | 525                | 1.00 | N/A    |      | N/A     |             |
| Increased 20 - 50%                     | 51              | 176                | 1.16 | 0.80   | 1.67 | 0.44    |             |
| Within 20%                             | 90              | 332                | 1.09 | 0.80   | 1.47 | 0.59    |             |
| Decreased 20 - 50%                     | 75              | 282                | 1.07 | 0.77   | 1.47 | 0.69    | 0.03        |
| Decreased ≥ 50%                        | 92              | 240                | 1.55 | 1.14   | 2.11 | 0.01    |             |
| <b>Serum gastrin-17</b>                |                 |                    |      |        |      |         |             |
| Decreased ≥ 100%                       | 54              | 206                | 1.00 | N/A    |      | N/A     |             |
| Decreased 20 to 100%                   | 78              | 297                | 0.98 | 0.66   | 1.45 | 0.93    |             |
| Within 20%                             | 86              | 392                | 0.85 | 0.58   | 1.24 | 0.40    |             |
| Increased 20 - 500%                    | 122             | 357                | 1.32 | 0.91   | 1.89 | 0.14    | 0.07        |
| Increased ≥ 500%                       | 62              | 197                | 1.20 | 0.79   | 1.82 | 0.38    |             |
| <b>Serum anti-<i>H. pylori</i> IgG</b> |                 |                    |      |        |      |         |             |
| Decreased ≥ 50%                        | 76              | 377                | 1.00 | N/A    |      | N/A     |             |
| Decreased 20 - 50%                     | 59              | 248                | 1.17 | 0.81   | 1.71 | 0.40    |             |
| Within 20%                             | 96              | 302                | 1.53 | 1.09   | 2.15 | 0.01    |             |
| Increased 20 - 50%                     | 44              | 140                | 1.51 | 0.99   | 2.30 | 0.06    | < 0.01      |
| Increased ≥ 50%                        | 135             | 354                | 1.91 | 1.39   | 2.63 | <.0001  |             |

<sup>a</sup> Defined as: (follow-up – baseline)/baseline x 100%

<sup>b</sup> Estimated using generalized estimating equations (GEE) for correlated binary outcomes

**Abbreviations:** *H. pylori*: *Helicobacter pylori*; PG: pepsinogen

**Supplementary Table 7.** Associations of relative temporal changes in serum PGI, PGII, the PGI/II ratio, anti-*H. pylori* IgG, and gastrin-17 levels with progression of gastric precancerous lesions when only last visit and baseline visit were included, Zhuanghe Gastric Diseases Screening Program, China.

| Relative change <sup>a</sup>           | Progression (n) | No progression (n) | OR <sup>b</sup> | 95% CI |      | P for trend |
|----------------------------------------|-----------------|--------------------|-----------------|--------|------|-------------|
| <b>Serum PGI</b>                       |                 |                    |                 |        |      |             |
| Decreased ≥ 50%                        | 56              | 245                | 1.00            | N/A    |      |             |
| Decreased 20 - 50%                     | 107             | 441                | 1.06            | 0.74   | 1.51 |             |
| Within 20%                             | 142             | 469                | 1.32            | 0.93   | 1.87 |             |
| Increased 20 - 50%                     | 63              | 192                | 1.43            | 0.95   | 2.15 | < 0.01      |
| Increased ≥ 50%                        | 89              | 229                | 1.69            | 1.15   | 2.47 |             |
| <b>Serum PGII</b>                      |                 |                    |                 |        |      |             |
| Decreased ≥ 50%                        | 77              | 424                | 1.00            | N/A    |      |             |
| Decreased 20 - 50%                     | 93              | 306                | 1.66            | 1.19   | 2.33 |             |
| Within 20%                             | 108             | 329                | 1.79            | 1.29   | 2.48 |             |
| Increased 20 - 50%                     | 41              | 152                | 1.49            | 0.98   | 2.27 | < 0.01      |
| Increased ≥ 50%                        | 136             | 356                | 2.10            | 1.54   | 2.88 |             |
| <b>Serum PGI/II ratio</b>              |                 |                    |                 |        |      |             |
| Increased ≥ 50%                        | 119             | 506                | 1.00            | N/A    |      |             |
| Increased 20 - 50%                     | 51              | 181                | 1.19            | 0.82   | 1.72 |             |
| Within 20%                             | 105             | 340                | 1.31            | 0.97   | 1.76 |             |
| Decreased 20 - 50%                     | 76              | 289                | 1.11            | 0.80   | 1.53 | < 0.01      |
| Decreased ≥ 50%                        | 103             | 247                | 1.79            | 1.32   | 2.43 |             |
| <b>Serum gastrin-17</b>                |                 |                    |                 |        |      |             |
| Decreased ≥ 100%                       | 69              | 208                | 1.00            | N/A    |      |             |
| Decreased 20 to 100%                   | 84              | 320                | 0.78            | 0.54   | 1.12 |             |
| Within 20%                             | 82              | 385                | 0.64            | 0.45   | 0.92 |             |
| Increased 20 - 500%                    | 117             | 384                | 0.92            | 0.65   | 1.29 | 0.27        |
| Increased ≥ 500%                       | 73              | 193                | 1.15            | 0.78   | 1.68 |             |
| <b>Serum anti-<i>H. pylori</i> IgG</b> |                 |                    |                 |        |      |             |
| Decreased ≥ 50%                        | 80              | 375                | 1.00            | N/A    |      |             |
| Decreased 20 - 50%                     | 55              | 223                | 1.16            | 0.79   | 1.69 |             |
| Within 20%                             | 83              | 306                | 1.26            | 0.90   | 1.78 |             |
| Increased 20 - 50%                     | 46              | 140                | 1.52            | 1.01   | 2.30 | < 0.01      |
| Increased ≥ 50%                        | 155             | 399                | 1.83            | 1.35   | 2.49 |             |

<sup>a</sup> Defined as: (follow-up – baseline)/baseline x 100%

<sup>b</sup> Estimated using generalized estimating equations (GEE) for correlated binary outcomes

**Abbreviations:** *H. pylori*: *Helicobacter pylori*; PG: pepsinogen
